# Supplementary material for: High lithium and sodium anodic performance of nitrogen-rich ordered mesoporous carbon derived from alfalfa leaves by a ball-milling assisted template method
Source: Royal Society of Chemistry journal article supplement (doi:10.1039/c6ta08485k), 2016-01-01
Supplement: c6ta08485k1.pdf [file c6ta08485k1.pdf]

*Supporting Information*

**High lithium and sodium anodic performance of nitrogen-rich ordered mesoporous carbon derived from alfalfa leaves by a ball-milling assisted template method**

Yongzhi Zhang, Yan Meng, Li Chen, Yong Guo \* and Dan Xiao\*

**Table S1.** ICP-AES results of the filtrate after reflux

| <b>Element</b> | <b>Ca</b>   | <b>K</b>    | <b>Mg</b>   | <b>Na</b>   | <b>Fe</b>   | <b>Al</b>   | <b>Mn</b>   | <b>Sr</b>   | <b>Ni</b>   | <b>Ba</b>   | <b>Zn</b>   |
|----------------|-------------|-------------|-------------|-------------|-------------|-------------|-------------|-------------|-------------|-------------|-------------|
| <b>t</b>       | <b>17.9</b> | <b>11.8</b> |             |             |             |             |             |             |             |             |             |
| <b>wt‰</b>     | <b>4</b>    | <b>7</b>    | <b>4.34</b> | <b>1.33</b> | <b>0.92</b> | <b>0.64</b> | <b>0.21</b> | <b>0.09</b> | <b>0.04</b> | <b>0.03</b> | <b>0.03</b> |

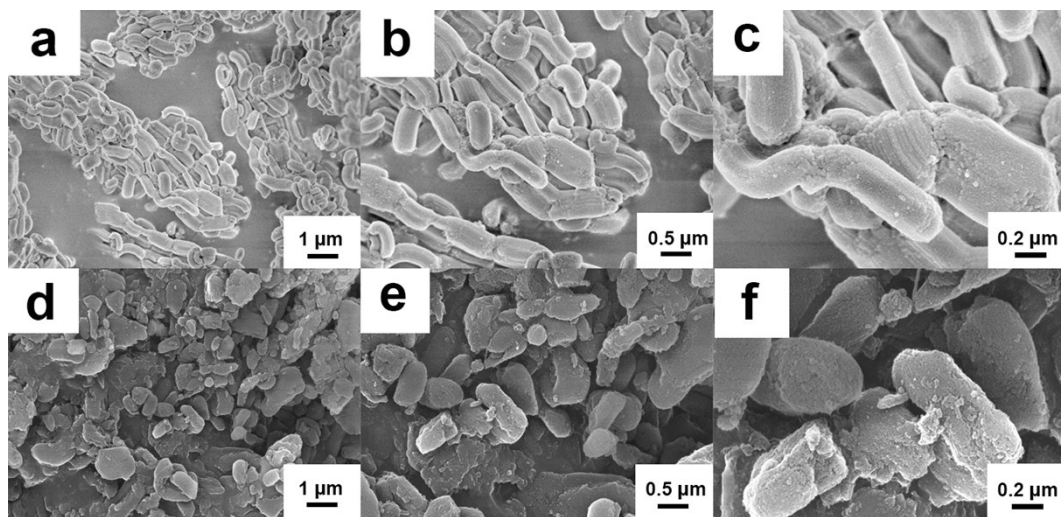

**Fig. S1** SEM images in different magnifications of SBA-15 template (a, b and c) and the re-ALs/SBA-15 composite (d, e and f).

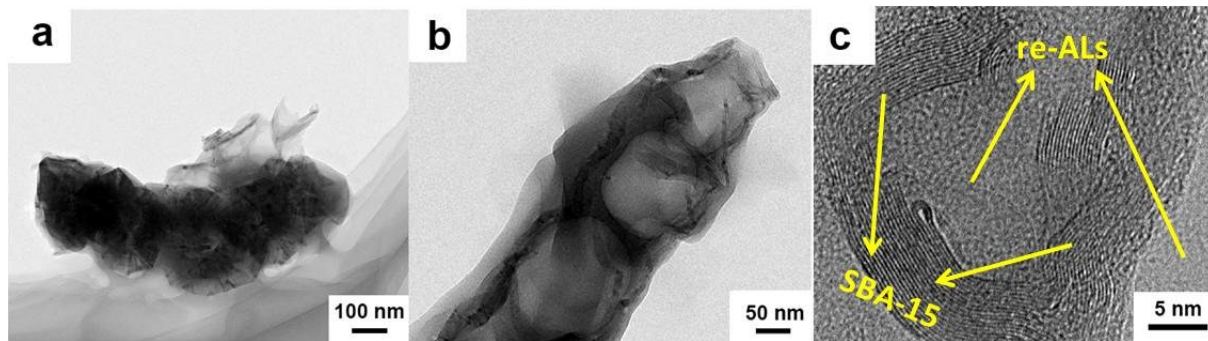

**Fig. S2** TEM (a and b) and HR-TEM (c) of the re-ALs/SBA-15 composite.

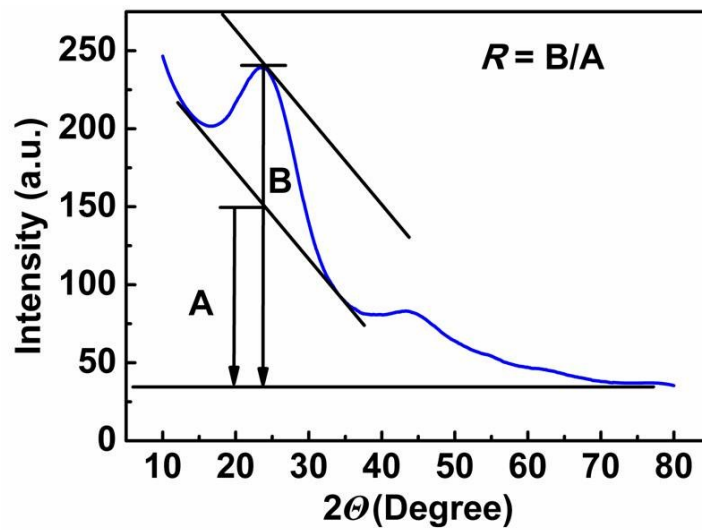

**Fig. S3** Scheme illustrating the R values calculation based on XRD patterns for ALNOMC.

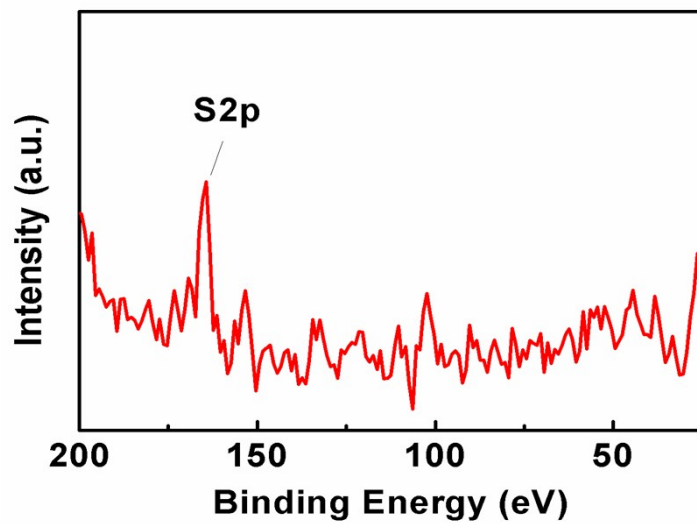

**Fig. S4** The partial XPS spectrum of ALNOMC.

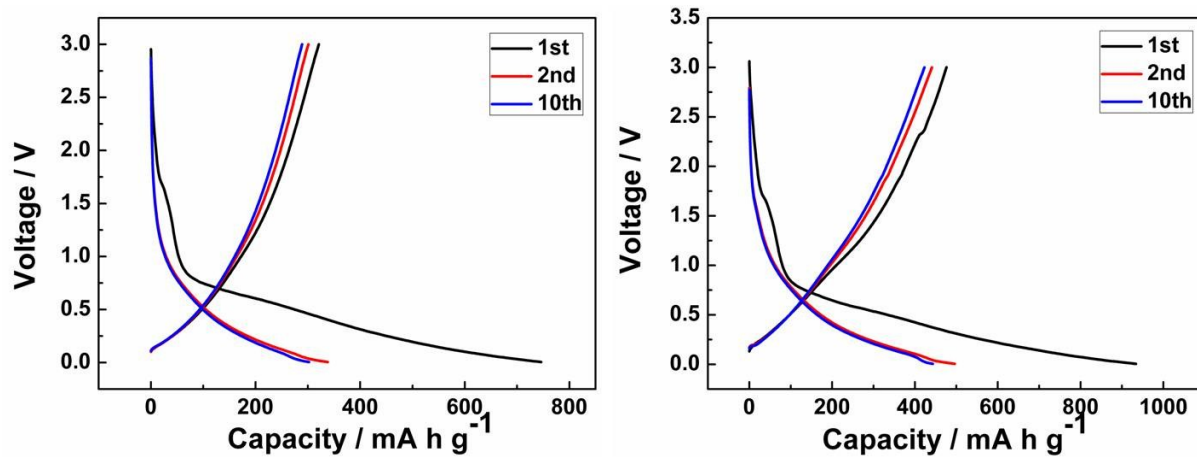

**Fig. S5** Charge-discharge curves of ALC (a) and re-ALC (b) at  $0.1 \text{ A g}^{-1}$ .

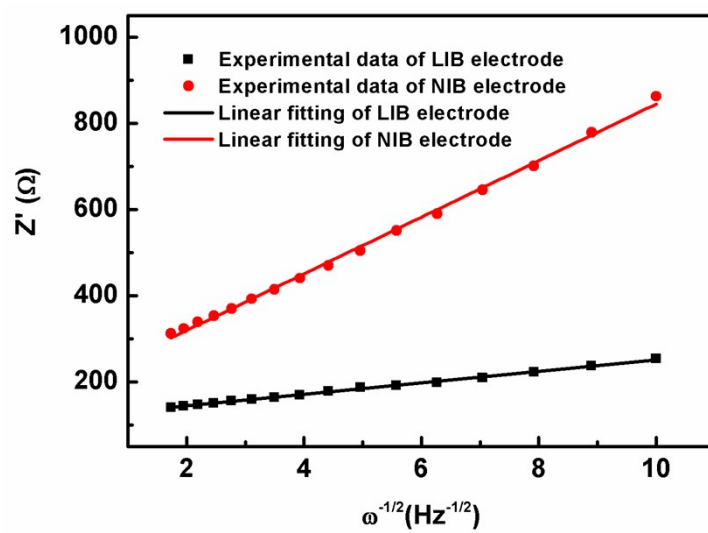

**Fig. S6** The relationship between  $Z'$  and reciprocal square root of frequency ( $\omega^{-1/2}$ ) for LIB and NIB electrodes of ALNOMC.

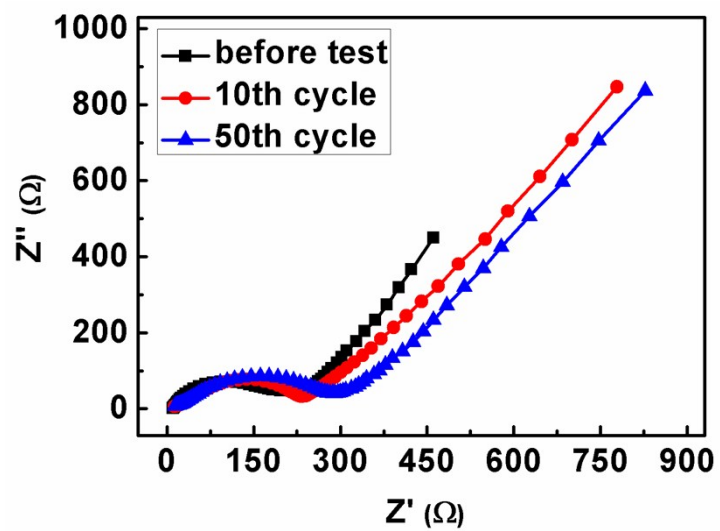

**Fig. S7** Electrochemical impedance spectra of ALNOMC electrodes before and after 10 and 50 cycles for NIBs.
